# Supplementary material for: On the benchmarking of multi-junction photoelectrochemical fuel generating devices
Source: Royal Society of Chemistry journal article supplement (doi:10.1039/c6se00083e), 2017-01-01
Supplement: c6se00083e1.zip [file c6se00083e1.zip]

## A more advanced YaSoFo example

(Done with YaSoFo v1.0)

In this example, you will learn how to do a series of calculations with YaSoFo, varying one parameter. The system will be a double junction cell under AM1.5G illumination, with a very good catalyst and intended for water splitting. The parameter, that we change, is the ohmic resistivity. At the end, we will plot the results.

Prerequisites: You have installed [SciPy](https://bitbucket.org/YaSoFo/yasofo) (Python 3.x version) on your computer and obtained YaSoFo from <https://bitbucket.org/YaSoFo/yasofo>. You have started a Python shell such as `ipython` in the directory where the files `yasofo.py` and `am15g.dat` are located.

```
In [9]: %matplotlib inline # remove this line if you want your plots in a separate window
import yasofo as yo
```

We can check if things are working by plotting the AM1.5G spectrum:

```
In [10]: yo.plot_spectrum()
```

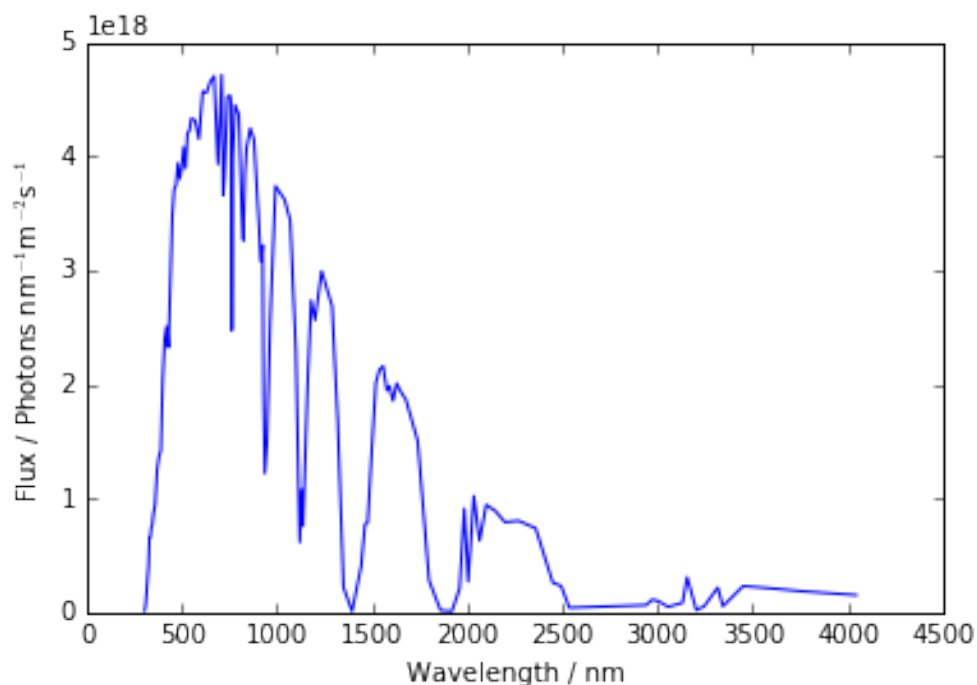

Okay, that works. So let us plot the possible bandgap combinations for a double junction cell with the resulting efficiencies for solar water splitting. By not specifying any parameters, the standard settings are used, i.e. AM1.5G, IrO<sub>2</sub> as a catalyst, no ohmic drop, 400 mV photovoltage loss per junction.

```
In [14]: double_junction = yo.best_gaps_double()
```

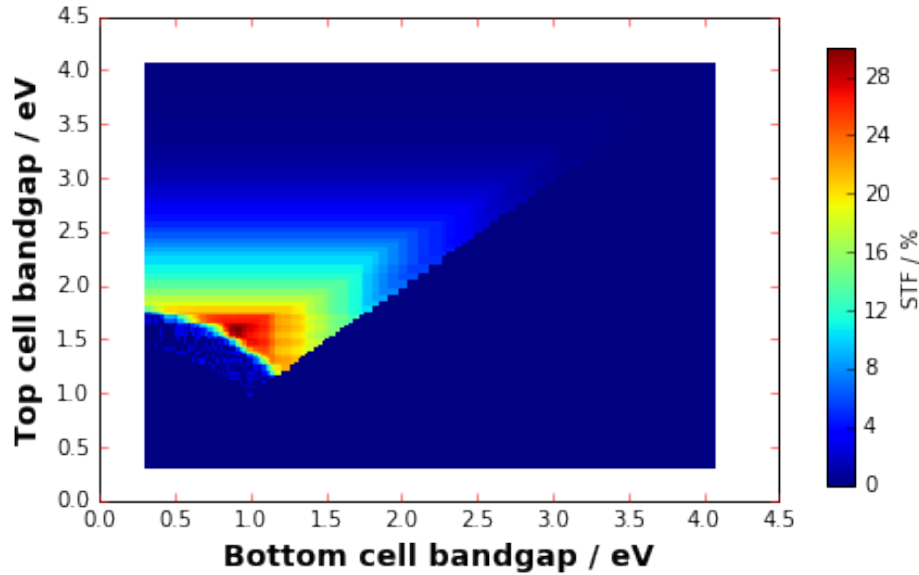

These are the standard plotting settings. If you want to control the settings for your plot, have a look at the [matplotlib documentation](#). The computed data is stored in the variable 'double\_junction', we just created. Let's say we want to study the impact of an ohmic drop from 0 to 25 Ohm in steps of 5 Ohm. We first create an array with the corresponding values:

```
In [20]: import numpy as np
         ohmic_drop = np.arange(0, 25.1, 5)
         print(ohmic_drop)

[ 0.  5. 10. 15. 20. 25.]
```

Above you see the values for the ohmic drop that will be tested. Now here the actual calculation, together with plotting:

```
In [22]: import math
         import matplotlib.pyplot as plt
         nrows = int(math.ceil(len(ohmic_drop) / 2.))
         efficiencies = []
         for drop in ohmic_drop:
             efficiencies.append(yo.best_gaps_double(cat_para=[yo.Ir02[0], yo.Ir02[1], drop],
                 plotting=False))
         # now we have the data, lets plot it nicely
         fig, axes = plt.subplots(nrows, ncols=2, figsize=(8, 12))
         for ax, efficiency, drop in zip(axes.flat, efficiencies, ohmic_drop):
             # we're setting the colour scale to be the same for all, i.e. first dataset
             p = ax.pcolor(efficiency[0], efficiency[0], efficiency[1]*1000, cmap=plt.cm.jet,
                 vmin=abs(efficiencies[0][1]*1000).min(),
                 vmax=abs(efficiencies[0][1]*1000).max())
             ax.set_xlabel("Bottom cell bandgap / eV")
             ax.set_ylabel("Top cell bandgap / eV")
             ax.set_title("Ohmic drop %.1f Ohm" %drop)
         plt.tight_layout()
         cb = plt.colorbar(p)
         cb.set_label("STF / %")
         plt.show(p)
```

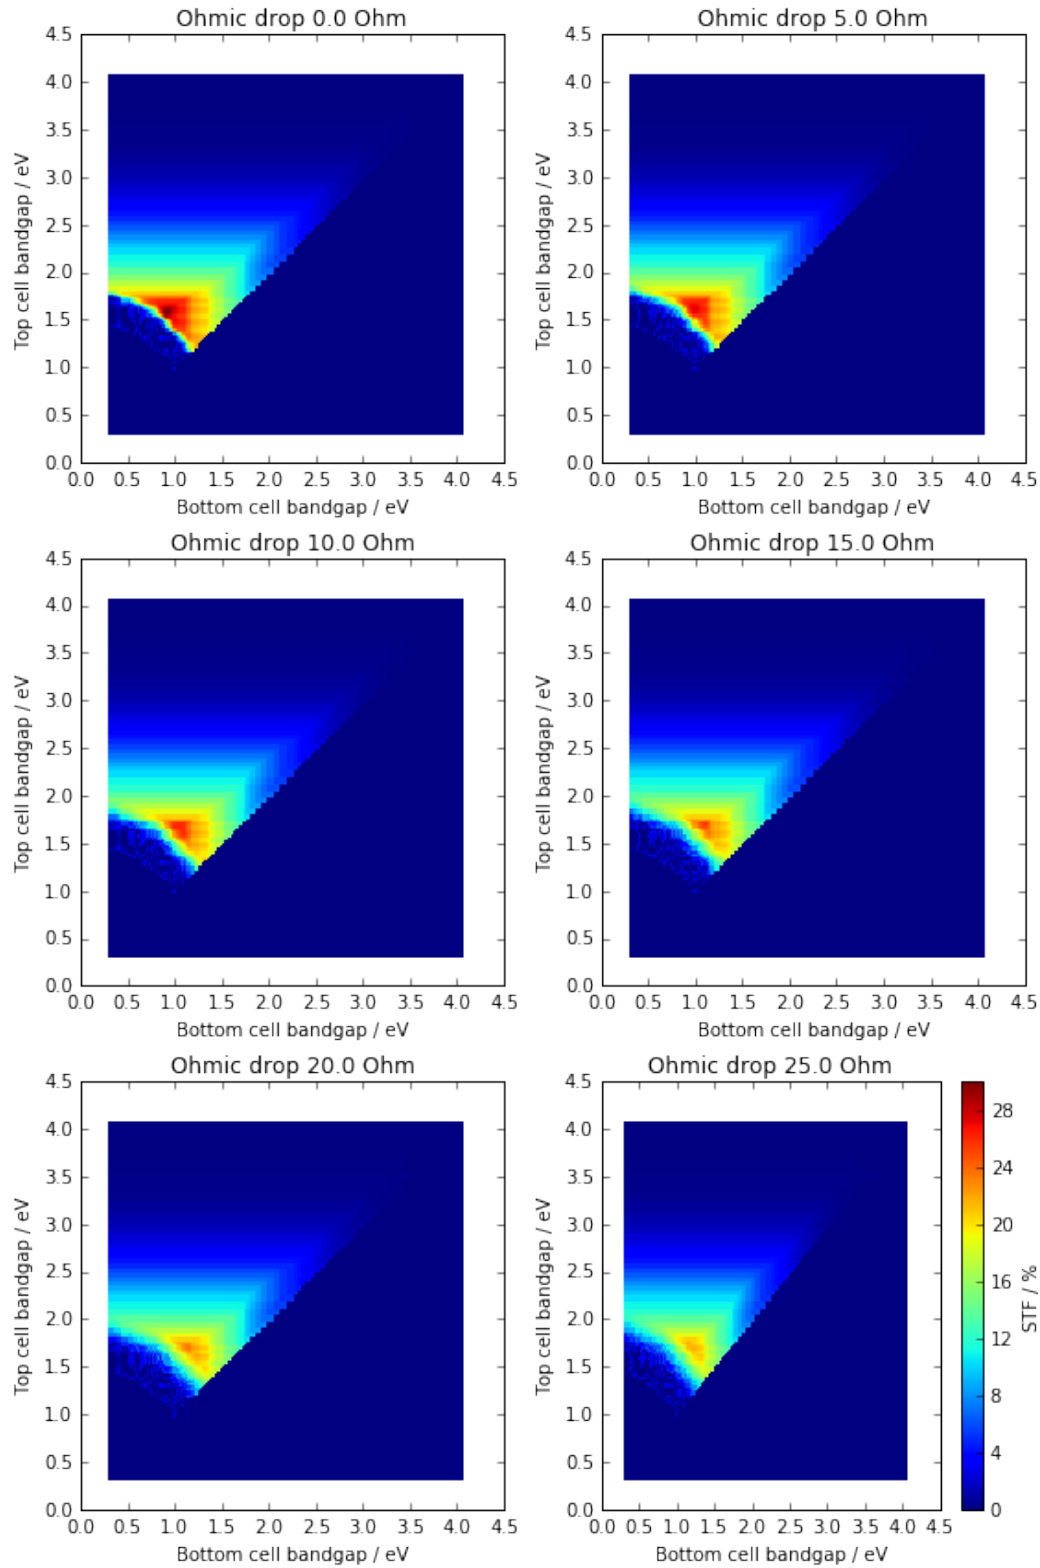

So we see that the max. efficiency is constantly decreasing with solution resistance. Not so surprising... Such a looping can be done with any kind of parameter in the model.
